# Supplementary material for: MicroRNA-940 promotes tumor cell invasion and metastasis by downregulating ZNF24 in gastric cancer
Source: PubMed Central journal article supplement (PMC4694841; doi:10.18632/oncotarget.4456), 2015-06-27
Supplement: oncotarget-06-25418-s001.pdf [file oncotarget-06-25418-s001.pdf]

## SUPPLEMENTARY FIGURES AND TABLES

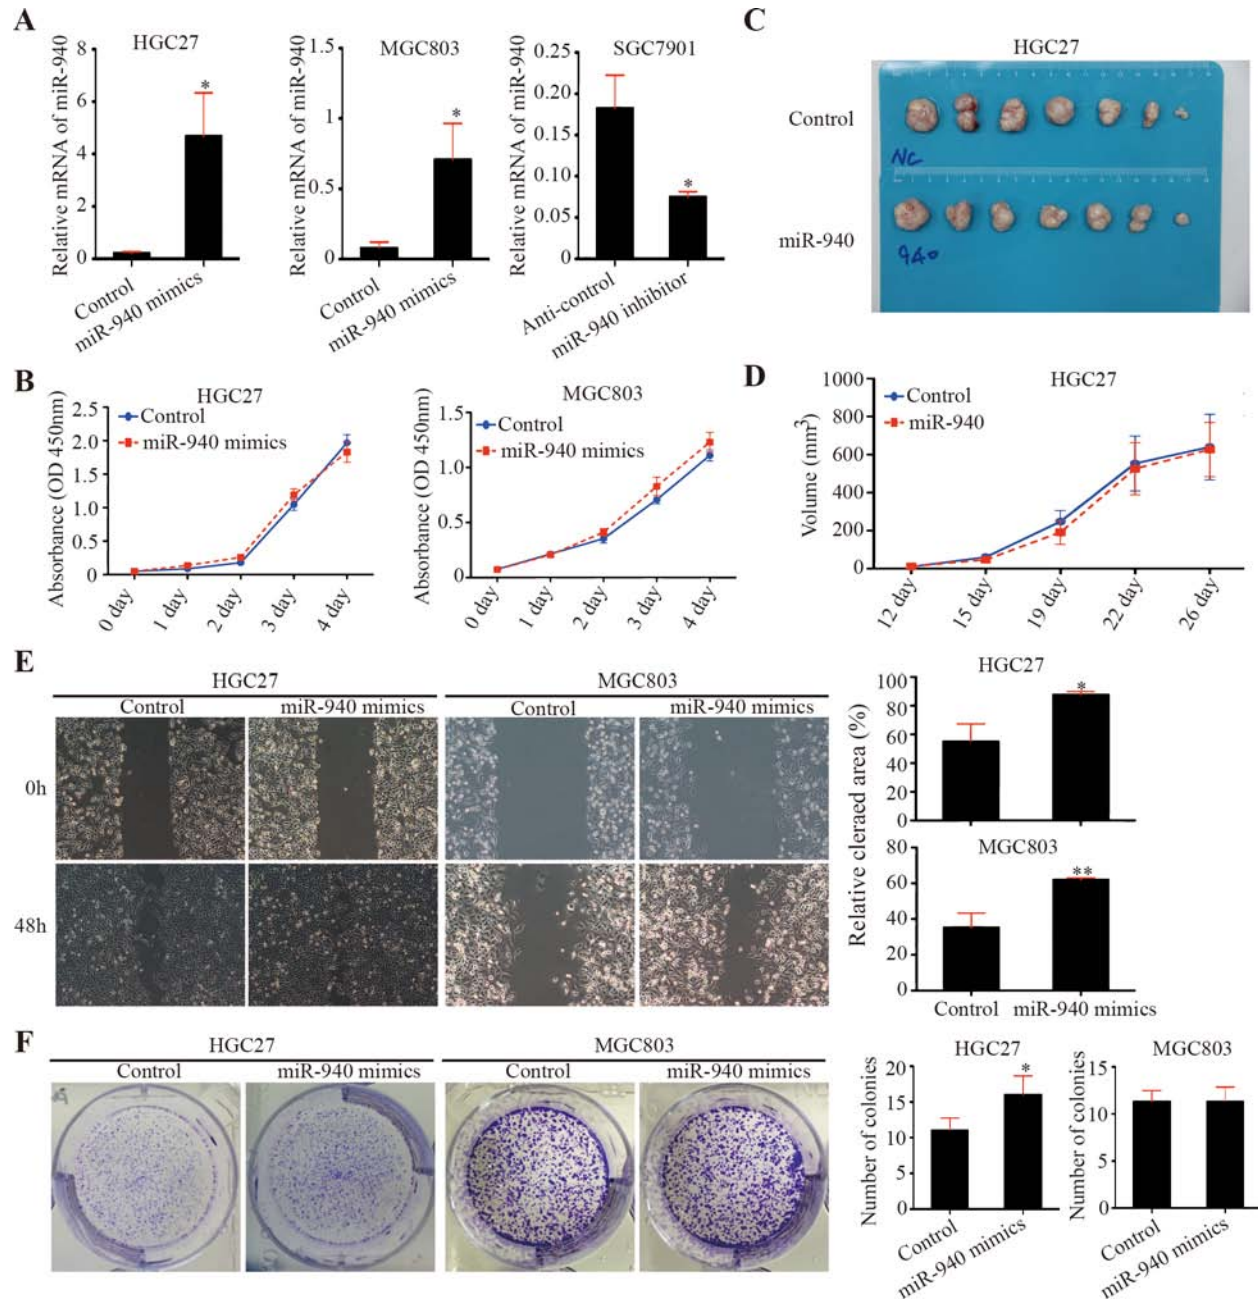

**Supplementary Figure S1: Impacts of miR-940 on gastric cell proliferation, migration and colony formation.** **A.** Efficiency validation of transfection of miR-940 mimics and inhibitors. **B.** Proliferation assays for HGC27 and MGC803 cells transfected with control/miR-940 mimics. **C.** Images of xenografts for HGC27 cells transfected with control/miR-940 lentivirus. **D.** *In vivo* proliferation assays of xenografts for HGC27 cells transfected with control/miR-940 lentivirus. **E.** Scratch assays for HGC27 and MGC803 cells transfected with control/miR-940 mimics. Bar graphs show relative cleared area. **F.** Colony formation assays for HGC27 and MGC803 cells transfected with control/miR-940 mimics. Bar graphs show colony count. \* $P < 0.05$ ; \*\* $P < 0.01$ .

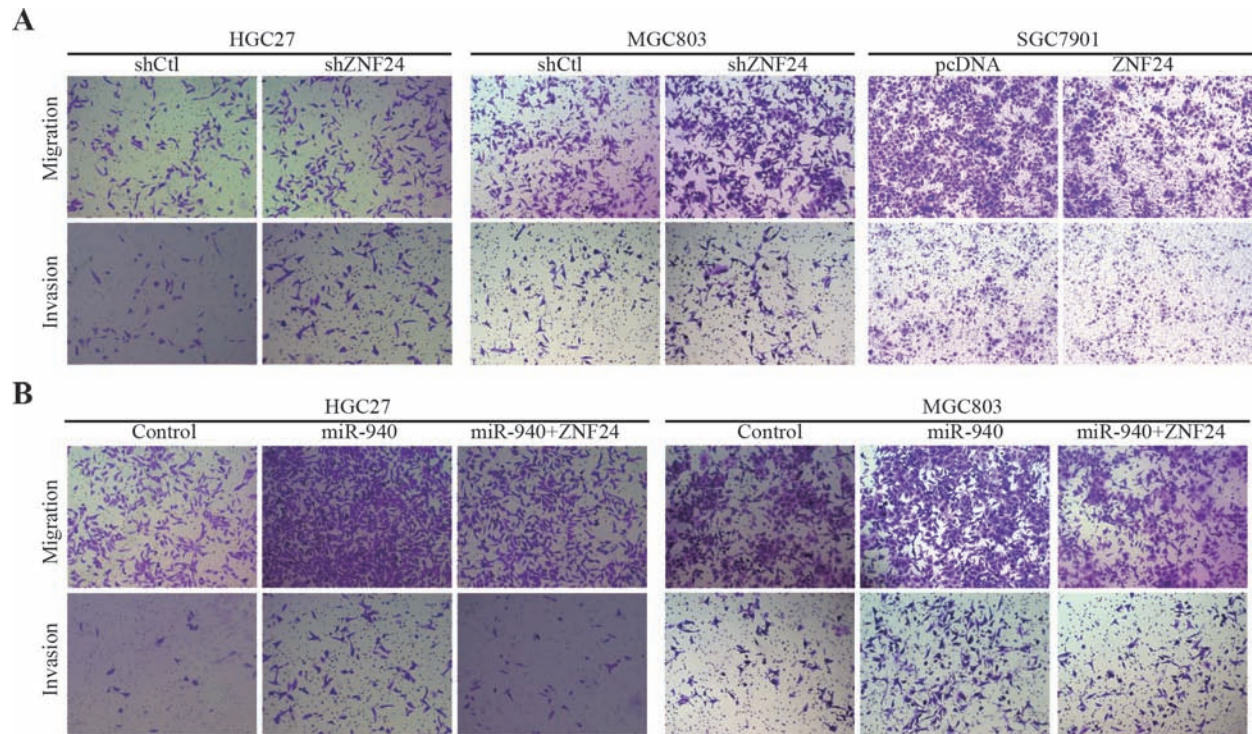

**Supplementary Figure S2: ZNF24 suppresses migration and invasion of gastric cancer cells *in vitro*.** **A.** Representative images show the migration and invasion assays for HGC27 and MGC803 cells transfected with control/shZNF24 plasmids as well as SGC7901 cells transfected with control/ZNF24 plasmids. **B.** Representative images show the migration and invasion assays for HGC27 and MGC803 cells transfected with control/miR-940/miR-940+ZNF24.

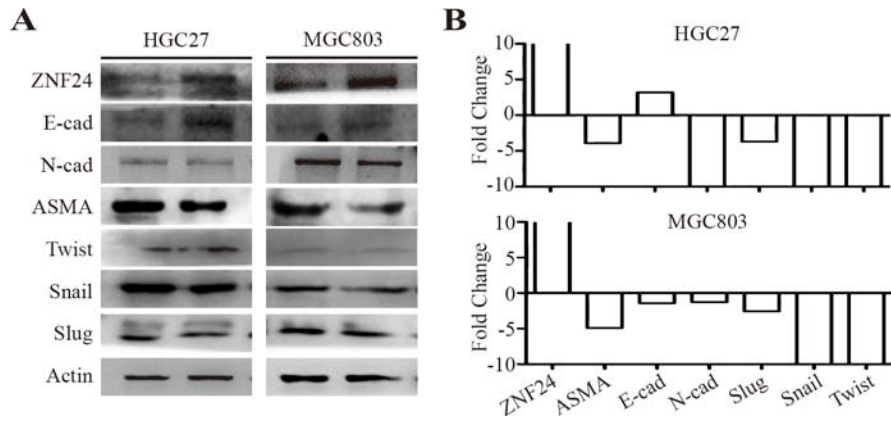

**Supplementary Figure S3: miRNA-940 indirectly influence EMT through regulating ZNF24.** **A.** Key molecules of EMT were assessed by western blots in the indicated cells. **B.** Key molecules of EMT were assessed by qRT-PCR in the indicated cells.

**Supplementary Table S1. Univariate and multivariate analysis of factors associated with time to recurrence in 123 gastric cancer patients**

| Time to recurrence                     |                        |                      |              |                        |                      |              |
|----------------------------------------|------------------------|----------------------|--------------|------------------------|----------------------|--------------|
|                                        | Univariate analysis    |                      |              | Multivariate analysis  |                      |              |
|                                        | Regression coefficient | HR (95%CI)           | P value      | Regression coefficient | HR (95%CI)           | P value      |
| Lauren type (diffusal v.s. intestinal) | -0.590                 | 0.554 (0.356, 0.861) | <b>0.009</b> | -0.278                 | 0.757 (0.586, 0.977) | <b>0.033</b> |
| Nerve invasion (yes vs. no)            | 0.834                  | 2.304 (1.432, 3.704) | <b>0.001</b> | 0.314                  | 1.368 (1.024, 1.828) | <b>0.034</b> |
| Vascular invasion (yes vs. no)         | 0.437                  | 1.548 (0.960, 2.500) | <b>0.073</b> | 0.148                  | 1.160 (0.867, 1.550) | 0.317        |
| T (4 vs. 1/2/3)                        | 0.702                  | 2.018 (1.111, 3.664) | <b>0.021</b> | 0.566                  | 1.761 (0.892, 3.479) | <b>0.034</b> |
| N (3 vs. 0/1/2)                        | 0.664                  | 3.204 (2.016, 5.091) | <b>0.000</b> | 0.058                  | 1.060 (0.625, 2.797) | 0.829        |
| M (1 vs. 0)                            | 0.981                  | 1.942 (1.237, 3.049) | <b>0.004</b> | 0.734                  | 2.083 (1.153, 3.762) | <b>0.015</b> |
| miR-940 (high vs. low)                 | 0.489                  | 1.631 (1.015, 2.619) | <b>0.043</b> | 0.477                  | 1.611 (0.964, 2.694) | <b>0.069</b> |

HR: hazard ratio; CI: confidence interval.

**Supplementary Table S2. Primary antibodies for Western blot and immunohistochemistry**

| Antibody       | Concentration for WB | Concentration for IHC | Specificity       | Company        |
|----------------|----------------------|-----------------------|-------------------|----------------|
| ZNF24          | 1:1000               | 1:100                 | Mouse monoclonal  | Abnova         |
| E-cadherin     | 1:1000               | /                     | Mouse monoclonal  | Abcam          |
| N-cadherin     | 1:1000               | /                     | Rabbit polyclonal | Abcam          |
| Vimentin       | 1:1000               | /                     | Rabbit monoclonal | Abcam          |
| $\alpha$ -SMA  | 1:500                | /                     | Rabbit polyclonal | Abcam          |
| Snail          | 1:200                | /                     | Rabbit monoclonal | Cell Signaling |
| Slug           | 1:500                | /                     | Rabbit polyclonal | Abcam          |
| $\beta$ -actin | 1:2000               | /                     | Mouse monoclonal  | Sigma          |

WB: Western blot; IHC: immunohistochemical staining.
